# Supplementary material
Source: PubMed Central journal article supplement (PMC4663158)

## SUPPLEMENTARY MATERIAL

### SUPPLEMENTARY FIGURE LEGENDS

**Figure S1. Elevated  $\gamma$ H2AX in T-cells from patients with uFCRC.** (a) Primary T-cells from pretreatment blood of 10 uFCRC cases, 10 sporadic CRC cases and their respective age- and sex-matched controls were stimulated by PHA and IL-2, and stained for nuclear  $\gamma$ H2AX foci. Relative levels of  $\gamma$ H2AX foci/cell are depicted. Cases: filled circles, sporadic CRC: filled triangle, uFCRC. Controls: open circles, sporadic CRC matched controls, open triangles uFCRC matched controls. Differences are not significant between matched cases and controls. (b) Comparison of  $\gamma$ H2AX foci/cell when cells in (a) are treated with vehicle, aphidicolin or UV, represented as levels observed uFCRC or sporadic CRC patients normalized to their control groups. For uFCRC patients, a statistically significant increase in accumulation of  $\gamma$ H2AX relative to controls was observed with aphidicolin ( $p=0.03$ ) or UV ( $p=0.04$ ); for sporadic CRC patients, only aphidicolin produced a significant increase relevant to controls ( $p=0.04$ ); for UV, difference between uFCRC and sCRC was highly significant ( $P = 0.0002$ ). P values were calculated using Wilcoxon rank-sum tests.

**Figure S2. Molecular model of SHPRH variant in patients 118294 and 130924.** The SHPRH structure (left, green) was modeled after the homologous 1Z63 *Sulfolobus solfataricus* SWI2/SNF2 ATPase core. The human missense R1184C substitution (dark blue; corresponding to residue R1187 in *Sulfolobus*) was mapped on this model adjacent to the DNA ligand found in this template structure (right, light brown) and the nearby C942 (yellow), predicted to compromise DNA binding directly and potentially via an aberrant disulfide bond to C942.

**Figure S3. Partial knockdown of variant proteins to simulate haploinsufficiency in HCT116 CRC cells induces  $\gamma$ H2AX.** Two different siRNAs, (used at 5nM concentration) per gene noted or GL2 negative control siRNA were used for transfection of HCT 116 cells (**a, b**) Total nuclear  $\gamma$ H2AX was scored by automated, computer-assisted microscopy in cells that were untreated (**a**) or treated with the DNA damaging agent irinotecan (**b**). Results are depicted as the mean of percent positive cells normalized to GL2 control. \*, P values are  $p < 0.05$ ; ns, not significant, calculated using a Wilcoxon rank-sum test. (**c**) Western analysis was used to confirm degree of knockdown ranged from ~35-60%, normalized to GL2 control.

**Figure S4. Knockdown of WRN and ERCC6 in HCT 116 CRC cells induces  $\gamma$ H2AX.** Using two different siRNAs per gene indicated or GL2 negative control at a 5nM concentration, HCT116 cells were transfected and degree of protein knockdown confirmed by Western analysis. Total nuclear  $\gamma$ H2AX was scored by automated, computer-assisted microscopy. Results are depicted as the mean of percent positive cells (y-axis). Knockdown of WRN and ERCC6 markedly increased  $\gamma$ H2AX ( $p < 0.05$  for each compared to GL2) calculated using a Wilcoxon rank-sum test.

**Figure S5. Consurf program analysis of the ERCC6 amino-terminal domain region predicts that the Pt1 variant N190 is functionally significant.** Sequence conservation is depicted by red shading (see key below). Residues predicted to be exposed are marked below by an 'e'. Residues predicted by these criteria to be functionally important are marked below by an 'f'. The variant residue (arrow) is in the center of a run of residues predicted to be functionally important.

**Figure S6. Evidence for genomic instability in Pt1 primary T-cells.** (a) A single Pt1 primary T-cell metaphase spread is shown (left) that exhibited a gain of chromosome 9 (right, arrow). (b) T-cells from Pt1 and her matched control were left untreated (No Rx) or treated with aphidicolin (Aph), camptothecin (Campto), etoposide (Etop), or UV. Pt1 cells exhibited consistently higher fractions of cells with > 10 nuclear  $\gamma$ H2AX foci (each  $P < 0.001$ , except UV:  $P = 0.006$ ). Cell numbers allowed an independent experiment for the no treatment and aphidicolin conditions, with good agreement (means +/- ranges). Inserted image:  $\gamma$ H2AX foci in Pt1 cells treated with aphidicolin. A total of 2,082 cells were counted, a minimum of 124 and mean of 149/ condition.

**Figure S7. Increased  $\gamma$ H2AX in Pt1 primary T-cells by confocal microscopy.** Pt1 cells and those from an age- and sex-matched control were processed as per Fig 1 without or with treatment with UV.  $\gamma$ H2AX foci in the nucleus were identified by co-staining with DAPI and scored by confocal microscopy. Depicted is the percentage of cells with >10 nuclear foci. A total of 183 cells were scored.

**Figure S8. Lower WRN and ERCC6 levels in Pt1-derived lymphocyte cell lines.** Two independent EBV-transformed B-cell lines (A, B) derived from each of Pt1 and a matched control were subjected to IB for WRN, ERCC6, and a loading controls ( $\alpha$ -tubulin). The ERCC6 experiment is shown in duplicate. Note the lower levels of WRN and ERCC6 in the patient-derived lines. Some degradation occurred in one Pt1A ERCC6 sample (left).

**Figure S9. Higher  $\gamma$ H2AX, p53, and phospho(P)-ATM levels in Pt1 cell lines A and B than in matched control lines.** The lines were cultured without DNA damaging treatment (a and b)

or following treatment with aphidicolin **(a)**. **(a)**  $\gamma$ H2AX levels detected by immunoblotting. H2AX: loading control. **(b)** P-ATM and p53 levels.  $\alpha$ -tubulin: loading control. Similar results were seen in two independent experiments.

## **SUPPLEMENTARY TABLES**

**Table S1: Detailed Summary of HQVs in uFCRC Patients**

**Table S2: HQVs in uFCRC patients, based on predictions of 4 programs**

**Table S3: Detailed Summary of HQVs in Polyposis Patients**

**Table S4: Demographics of uFCRC Patients**

**Table S5: Representation of Variants in EVS**

**Table S6: Representation of Variants in ExAC**

**Table S7: Representation of variants in the ITMI cohort**

## **SUPPLEMENTARY METHODS.**

**Clinical data.** Clinical information was obtained from medical records of the Fox Chase Cancer Center Risk Assessment Program. Documentation of colon neoplasia was typically from records of colonoscopy and/or pathology of resected colon, as noted. Extensive polyposis was ruled in or out by examination of records of colonoscopy and/or pathological analysis of the resected colon. If polyposis was observed, patients received genetic testing for FAP and MutYH polyposis. CRCs were tested for microsatellite instability and/or immunohistochemistry for mismatch repair proteins. In addition, exome sequencing was performed, which excluded known pathogenic mutations in FAP, MutYH, and mismatch repair proteins. Family histories were obtained by trained genetics counselors and verified by attending physicians. Blood samples were banked under broad consent for research and de-identified. Patient identifying information was maintained separately and provided to the principal investigator in de-identified fashion. All work was approved by the Institutional Review Board.

**Lymphocyte cell preservation, culture, drug treatments, and metaphase spreads.** Peripheral blood was collected by venipuncture in 10 ml acid-citrate-dextrose vacutainor tubes at room temperature and processed the same day. The tubes were centrifuged at 800g for 10 min. The buffy coat was extracted, diluted with an equal volume of phosphate buffered saline (PBS), layered over 7 ml of Ficoll-Paque and centrifuged at 450g for 15 min. The cloudy band below the red platelet/plasma layer and above the Ficoll/granulocyte layer was extracted, diluted in an equal volume of PBS, and centrifuged at 300g for 12 min. The cell pellet was resuspended in 5mL of PBS and centrifuged again at 300g for 12 min. The cell pellet as resuspended in 90% fetal bovine serum and 10% dimethylsulfoxide. The cells derived from 10 ml

of blood were aliquotted into one 2 ml tube, placed into a controlled-rate freezing container, stored at  $-80^{\circ}\text{C}$  for a minimum of 4 h, and transferred to the vapor phase of a liquid nitrogen tank.

The samples were cultured at  $1 \times 10^6$  cells per ml in RPMI-1640 containing 15% fetal bovine serum (HyClone), 2 mM L-glutamine (Life Technologies), 50 mM 2-mercaptoethanol (Sigma), 0.2 units human recombinant insulin (Sigma) per ml, 50 units penicillin and 50 mg streptomycin per ml (complete RPMI) with phytohemagglutinin (PHA), M form, (Life Technologies) at a final concentration of 1.5%. All incubations were done in a humidified,  $37^{\circ}\text{C}$  incubator with 5%  $\text{CO}_2$ . Proliferation of resting T cells, previously stimulated with PHA, was induced by culturing them in 12-well plates with the following immobilized monoclonal antibodies (mAb): anti-human CD28 (clone CD28.2, BioLegend) and anti-human CD3 (clone OKT3, prepared in this laboratory). To prepare the plate-bound mAb, 0.5 ml of PBS containing both mAb at 1 mg/ml was added per well and the plate incubated overnight at  $4^{\circ}\text{C}$ . After washing each well twice with PBS,  $1 \times 10^6$  T cells/well were added in 2 ml complete RPMI containing 50 units/ml recombinant human interleukin 2 (IL-2) (NCI Preclinical Repository). After a 48 h incubation, the cells were adjusted to  $5 \times 10^5$ /ml by adding additional complete RPMI with IL-2 and returned to the incubator.

To generate metaphase spreads, 66h after stimulation KaryoMax colcemid (Life Technologies) was added (0.03 mg/ml final concentration) and cultures were incubated an additional 2 h. Cultured cells arrested in metaphase were swollen in a hypotonic solution, then fixed according to standard protocols. Briefly, cells were centrifuged and resuspended in a hypotonic solution of 0.075 M KCl. After 15 min at  $37^{\circ}\text{C}$ , a few drops of cold, freshly prepared Carnoy's Fixative (3 parts methanol: 1 part glacial acetic acid) was added, the cells centrifuged,

then treated for 30 min at 4°C in 10 ml fixative. Cells were washed three more times in cold fixative, then resuspended in fixative to give a cloudy suspension, and dropped onto slides, according to classical methods. 50 well-separated spreads were scored per sample.

**Variant frequency analysis in controls.** Variants in the DNA DSB repair genes were extracted using genome coordinates retrieved from the UCSC hg19 human genome browser (<http://genome.ucsc.edu/>) then filtered for call quality and predicted impact on the encoded protein sequence as previously described for the ITMI cohort <sup>1</sup>. Allele frequencies were computed with VCFtools v0.1.12b <sup>2</sup> and annotations with ANNOVAR version 2014-07-22 <sup>3</sup> using refSeq transcripts <sup>4</sup>.

**Mutation frequency analysis.** The frequency of somatic mutations in genes of interest was extracted from TCGA studies (<http://cancergenome.nih.gov/>) using cBioPortal <sup>5</sup>. Information about most common transcripts for each gene was extracted from the Ensemble database using Biomart tool (<http://www.ensembl.org/biomart/martview/>), and the somatic mutation frequency was normalized to the length of longest mRNA for each gene. Heatmaps visualizing the frequencies of somatic mutations in the selected TCGA sets were produced using the software MeV (MultiExperiment Viewer), version 4.8 (<http://www.tm4.org/mev.html>).

**Generation and transfection of B-cell lines.** B-cells from patients and normal controls were immortalized with Epstein-Barr virus (EBV) according to Tosato and Cohen <sup>6</sup>. Briefly, lymphocytes isolated from 10 ml blood by centrifugation over Ficoll-Paque were resuspended in 2.5 ml complete RPMI-1640 without insulin. Immortalization was initiated by the addition of

EBV strain B95-8 as 1 ml of filtered supernatant from the marmoset B-cell line GM 7404. After incubation for 2 h at 37°C, 6.5 ml of complete RPMI containing 1 mg/ml cyclosporine A (Sigma) was added and the suspension cultured at 37°C, 5% CO<sub>2</sub> in an up-right flask. After 3 weeks, the culture was split and 5 ml fresh medium added to each flask. After an additional week of incubation, cells in one of the flask pairs were cryopreserved and cells in the second flask were subcultured for eventual harvest. For WRN and ERCC6 'rescue' experiments, cell lines were transfected with empty or control vector (hWRN-pDsFLAG, and pGK-lenti-Neo-ERCC6, respectively) using lipofectamine and selected in neomycin.

**Exome sequencing and variant calling.** Exome libraries enriched for coding exon sequences were captured using the SureSelect Version V Target Enrichment System (Agilent Technologies, Wilmington, DE). The libraries were amplified by PCR using the supplied paired-end PCR primers. Sequence reads were mapped to the human reference genome (hg19) using the SamTools package and BWA. Duplicated reads were removed with the Picard software. Recalibration of base quality and indel realignment was performed with the GATK package from Broad Institute (Cambridge, MA). Single nucleotide variants and indel variants were identified using the Unified Genotyper caller of the GATK package, using external and high quality internal exome references. Rare variants (frequency less than 1/100 in public exome data bases (Exome Variant server, [www. http://evs.gs.washington.edu/EVS/](http://evs.gs.washington.edu/EVS/))) were annotated with SeattleSeq Annotation (<http://gvs.gs.Washington.edu/SeattleSeqAnnotation/>). A SQL database was created from the annotated dataset. Manual examination was conducted with TViewer of SamTools and the Integrated Genomic Viewer, to identify high confidence variants from the raw sequence data. Missense variants that had at least 15 sequencing reads covering the site, of which



at least 6 were variant, were validated by direct Sanger sequencing. All 23 validated, as noted in Supplementary Table 1. Thereafter, missense variants were considered validated if the encompassing sequence was present in at least 30 reads, at least 10 of which were variant, and surrounding sequences contained few variants. To minimize type 1 error, a few variants were excluded based on reported highly restricted tissue or subcellular expression (e.g. not detected in colon; GeneCards website (Weizman Institute of Science, <http://www.genecards.org/>)). These variants were included in the statistical analysis of potential enrichment of HQVs within pathways, to avoid bias.

**Analysis of somatic mutation frequencies.** Mutation frequencies were retrieved using cBioPortal (<http://www.cbioportal.org/public-portal/index.do>). Data were extracted from the datasets with >100 sequenced samples. The most recent (provisional) TCGA datasets were used, when available. Data were visualized using MeV: MultiExperiment Viewer (<http://www.tm4.org/mev.html>). Transcripts lengths were obtained from the Ensemble Genome Browser ([www.ensembl.org/](http://www.ensembl.org/)), and the frequencies of mutations in CRCs were normalized to the length of the longest transcript (per 1000 nucleotides).

**Molecular modeling.** A homology model of SHPRH was built using the Biological Assembly Modeller (BAM) software <sup>6</sup> based on the template *Sulfolobus solfataricus* SWI2/SNF2 ATPase core in complex with dsDNA (PDB code 1Z63, 14% identity homolog). Side-chain rotamers were optimized with a backbone dependent library and the SCWRL 4 software <sup>7</sup>. Modeling using a Zebrafish protein (Uniprot accession Q7ZV09) template (PDB code 1Z3I), placed the R1187 in the exact same position.

**WRN helicase assays.** The WRN vectors were introduced into the bacterial strain ArcticExpress (ARX) by transformation and the expression of the fusion proteins was induced with 1mM IPTG at 12°C for 24 h. The fusion proteins were purified with glutathione affinity beads (Sigma, MO) following standard procedures<sup>8</sup>. The purified fusion proteins were dialyzed against ELB (10mM HEPES (pH 7.5)/50mM KCl/2.5mM MgCl<sub>2</sub>/250mM sucrose/1mM DTT) at 4°C and then stored at -80°C in 5µl aliquots.

**ERCC6 chromatin remodeling assay.** For nucleosome assembly and remodeling assays, DNA fragments of ~240 bp containing the 601 nucleosome phasing sequence was assembled into mononucleosome with purified HeLa histones using step-gradient salt dialysis<sup>9</sup>. DNA fragments used for assembly were generated by PCR and radio-labeled with [<sup>32</sup>P] α-dATP. Remodeling assays were carried out in 12 mM Hepes (pH7.9), 10 mM Tris·HCl (pH 7.5), 60 mM KCl, 8% glycerol, 4 mM MgCl<sub>2</sub>, 2 mM ATP·Mg and 0.02% NP40 at 30°C for 15 min, as described previously<sup>9</sup>. Nucleosomes were used at 1 nM, ERCC6 and the variant were used at 25 nM.

**Comet assays.** Briefly, cells were washed with PBS and embedded in 1% low melting agarose on slides, lysed and then electrophoresed under neutral conditions following the protocol from Trevigen (<http://www.trevigen.com/cat/1/3/0/CometAssay>). Slides were placed in a DNA precipitation solution, dried, and then stained with DAPI and imaged on a Nikon Eclipse E800 epifluorescence microscope. At least 50 cells were analyzed per condition using the CometScore software (TriTek Corp., Sumerduck, VA). The ‘Olive tail moment’ is computed as the summation of each tail intensity integral value, multiplied by its relative distance from the center

of the head (the point at which the head integral was mirrored), and divided by the total comet intensity.

**siRNA studies in HCT 116 cells.** Total nuclear  $\gamma$ H2AX in HCT 116 CRC cells was scored in automated fashion, by computer-assisted microscopy. Images in each wavelength (TRITC, DAPI) were acquired per well using the ImageXpress micro automated microscope (Molecular Devices) driven by MetaXpress software. Images were analyzed in the Multiwavelength Scoring module of MetaXpress and results were displayed and exported utilizing the AcuityXpress software package (Molecular Devices). HCT 116 CRC cells were transfected with GL2 or two independent siRNAs (5nM) for each protein. Western analysis was performed for the respective proteins and  $\alpha$ -tubulin loading control. Total protein levels were quantified and normalized to the loading control. The data are plotted as relative induction of  $\gamma$ -H2AX to GL2 control from 2 independent experiments.

**Statistics.** We summarized continuous and count data using means and medians, and tested for differences between cell cultures (case versus control) using Wilcoxon rank-sum tests. For binary and categorical outcomes, we created frequency tables and used Fisher's exact test to assess the relationship with case/control status. For  $\gamma$ H2AX staining in the validation set patients, we used ROC curves to assess discrimination between cases and controls. We found optimal cutpoints using Youden's index <sup>10</sup>, and used the best thresholds to determine whether samples were  $\gamma$ H2AX positive or negative. To find a threshold using combined UV and aphidicolin, we created an ROC curve using regression-based predictors. We then used Fisher's exact test to assess whether the dichotomized outcomes were significantly associated with

case/control status. To assess the relationship between olive tail moments and case status, we used Poisson models for 'No treatment' and Aph conditions, and a negative binomial model for UV due to evidence of overdispersion. We accounted for within-patient correlation using Generalized Estimating Equations. Variant frequencies in patients and controls were compared using a Poisson ratio test. The fraction of variants in a specific pathway that were high quality was compared to the fraction of HQVs in all GO term-flagged variants by Fisher's exact test. A Wilcoxon rank-sum test was used in siRNA experiments to compare  $\gamma$ H2AX levels in gene-targeting conditions to the GL2 control. For comparing protein expression post knockdown, a generalized linear model was used assuming gamma family and log link with robust standard errors.

## SUPPLEMENTARY REFERENCES

1. Bodian DL, McCutcheon JN, Kothiyal P, et al. Germline variation in cancer-susceptibility genes in a healthy, ancestrally diverse cohort: implications for individual genome sequencing. *PLoS One* 2014;9:e94554.
2. Danecek P, Auton A, Abecasis G, et al. The variant call format and VCFtools. *Bioinformatics* 2011;27:2156-8.
3. Wang K, Li M, Hakonarson H. ANNOVAR: functional annotation of genetic variants from high-throughput sequencing data. *Nucleic Acids Res* 2010;38:e164.
4. Pruitt KD, Brown GR, Hiatt SM, et al. RefSeq: an update on mammalian reference sequences. *Nucleic Acids Res* 2014;42:D756-63.
5. Cerami E, Gao J, Dogrusoz U, et al. The cBio cancer genomics portal: an open platform for exploring multidimensional cancer genomics data. *Cancer Discov* 2012;2:401-4.
6. Tosato, G. and J.L. Cohen, *Current Protocols in Immunol* 7.22.1 – 7.22-4, 2007.
7. Shapovalov MV, Wang Q, Xu Q, et al. BioAssemblyModeler (BAM): User-Friendly Homology Modeling of Protein Homo- and Heterooligomers. *PLoS One* 2014;9:e98309.
8. Ausubel FM, Brent R, Kingston RE, et al. *Current Protocols in Molecular Biology*. Greene Publishing Associates & Wiley-Interscience. 1988.
9. Cho I, Tsai PF, Lake RJ, et al. ATP-dependent chromatin remodeling by Cockayne syndrome protein B and NAP1-like histone chaperones is required for efficient transcription-coupled DNA repair. *PLoS Genet* 2013;9:e1003407.
10. Youden WJ. Index for rating diagnostic tests. *Cancer* 1950;3:32-5.

**Supplementary Table 1. Detailed Summary of High Quality Variants in uFCRC Patients**

| Patient ID No. | HQ Variant                    | Chr Band#                                             | Position                                   | DNA Sequence                                       | AA Sequence                               | Freq                               | Rs No.                       | SIFT              | PP2                  |
|----------------|-------------------------------|-------------------------------------------------------|--------------------------------------------|----------------------------------------------------|-------------------------------------------|------------------------------------|------------------------------|-------------------|----------------------|
| 111797         | CHAF1B                        | 21q22.12-3                                            | 37758481                                   | c.47T>C                                            | p.V16A                                    | 0.004                              | rs143543321                  | D                 | 1                    |
| 118294         | SHPRH                         | 6q24.3                                                | 146243968                                  | c.3550C>T                                          | p.R1184C                                  | 0.007                              | rs148401398                  | D                 | 0.99                 |
| 120713 (Pt1)   | WRN<br>ERCC6                  | 8p12<br>10q11.23                                      | 30969156<br>50738771                       | c.2114C>T<br>c.538A>T                              | p.T705I<br>p.N180Y                        | 0.0004<br>0                        | rs141563618<br>NA            | D<br>D            | 1<br>1               |
| 122517         | POLD1<br>MCM10<br>MPG<br>SKA1 | <b>19q13.33</b><br>10p13<br>16p13.3<br><b>18q21.1</b> | 50909713<br>13240791<br>135643<br>47917649 | c.1433G>A<br>c.2225C>A<br>c.765_771del<br>c.467C>T | p.S478N<br>p.T742K<br>p.A255NA<br>p.T156M | 0 (c.f. Palles)<br>0.003<br>0<br>0 | NA<br>rs41291311<br>NA<br>NA | D<br>D<br>NA<br>D | 1<br>0.99<br>NA<br>1 |
| 123000         | SPAG5<br>BRD4                 | 17q11.2<br>19p13.12                                   | 26918796<br>15376259                       | c.1357C>T<br>c.755C>G                              | p.R453W<br>p.P252R                        | 0<br>0.002                         | NA<br>rs200633797            | D<br>D            | 1<br>0.97            |
| 123006         | MASTL                         | 10p12.1                                               | 27454325                                   | c.668C>A                                           | p.P223Q                                   | 0                                  | NA                           | D                 | 1                    |
| 123163         | DYNC1H1<br>CHAF1A             | 14q32.1<br>19p13.3                                    | 102507911<br>4431979                       | c.11942C>G<br>c.1978C>T                            | p.T3981R<br>p.R660C                       | 0.002<br>0                         | rs138428684<br>NA            | T<br>D            | 0.98<br>1            |
| 123320         | MSH2                          | 2p21                                                  | 47630468                                   | c.138C>G                                           | p.H46Q                                    | 0.002                              | rs33946261                   | D                 | 0.99                 |
| 124744         | FANCL                         | 2p16.1                                                | 58392874                                   | c.676C>T                                           | p.R226C                                   | 0                                  | NA                           | D                 | 1                    |
| 125380         | None                          |                                                       |                                            |                                                    |                                           |                                    |                              |                   |                      |
| 125659         | EEPD1                         | 7p14.2                                                | 36327344                                   | c.1273C>T                                          | p.R425W                                   | 0.0002                             | rs202090314                  | D                 | 1                    |
| 126780         | ERCC2                         | 19q13.3                                               | 45856060                                   | c.1846C>T                                          | p.R616W                                   | 0.00008                            | rs121913024                  | D                 | 1                    |
| 126875         | ANAPC10                       | <b>4q31.21</b>                                        | 145916666                                  | c.417T>G                                           | p.I139M                                   | 0.0005                             | rs199788158                  | D                 | 0.99                 |
| 127581         | CTC1                          | 17p13.1                                               | 8141897                                    | c.248G>C                                           | p.S83T                                    | 0.006                              | rs78870822                   | D                 | 1                    |
| 129338         | None                          |                                                       |                                            |                                                    |                                           |                                    |                              |                   |                      |
| 132231         | C19Orf40                      | 19q13.11                                              | 33467427                                   | c.487G>A                                           | p.V163M                                   | 0.0004                             | rs141801484                  | D                 | 1                    |
| 132406         | DDX11<br>LIG1                 | 12p11.21<br>19q13:33                                  | 31244665<br>48619195                       | c.1102C>T<br>c.2611C>T                             | p.P368S<br>p.R871C                        | 0<br>0                             | NA<br>NA                     | D<br>D            | 1<br>1               |
| 132667         | LIG3                          | 17q11.2-12                                            | 33318982                                   | c.1214C>T                                          | p.T405I                                   | 0                                  | NA                           | D                 | 1                    |
| 133012         | POLD3                         | <b>11q13.9</b>                                        | 74345739                                   | c.1118A>C                                          | p.K373T                                   | 0.001                              | rs181857010                  | T                 | 0.96                 |
| 134321         | none                          |                                                       |                                            |                                                    |                                           |                                    |                              |                   |                      |

Chr band: chromosome band, bold: loci linked by GWAS to CRC risk; Position: chromosomal position; DNA seq: position in the cDNA  
 Freq: frequency of HQVs in on-line exome databases (Exome Variant Server); Rs No: reference single nucleotide polymorphism (SNP) number; SIFT: scale-invariant feature transform algorithm score; PP2: PolyPhen2 algorithm score.

Supplementary Table 2

## HQVs in uFCRC patients based on predictions of 4 programs

| patient ID | Gene     | INPUT (chromosome; position; ref. nt; detected nt) | Amino acid change | Polyphen-2 prediction | MutationAssessor prediction | SIFT prediction | PROVEAN prediction |
|------------|----------|----------------------------------------------------|-------------------|-----------------------|-----------------------------|-----------------|--------------------|
| 111797     | CHAF1B   | 21,37758481,T,C                                    | V16A              | probably damaging     | medium                      | Damaging        | Deleterious        |
| 118294     | SHPRH    | 6,146243968,G,A                                    | R1184C            | probably damaging     | medium                      | Damaging        | Deleterious        |
| 120713     | WRN      | 8,30969156,C,T                                     | T705I             | probably damaging     | high                        | Damaging        | Deleterious        |
|            | ERCC6    | 10,50738771,T,A                                    | N180Y             | probably damaging     | medium                      | Damaging        | Deleterious        |
| 122517     | POLD1    | 19,50909713,G,A                                    | S478N             | probably damaging     | high                        | Damaging        | Deleterious        |
|            | MCM10    | 10,13240791,C,A                                    | T742K             | probably damaging     | low                         | Damaging        | Deleterious        |
|            | SKA1     | 18,47917649,C,T                                    | T202M             | probably damaging     | low                         | Damaging        | Deleterious        |
| 123000     | SPAG5    | 17,26918796,G,A                                    | R453W             | probably damaging     | low                         | Damaging        | Deleterious        |
|            | BRD4     | 19,15376259,G,C                                    | P252R             | probably damaging     | low                         | Damaging        | Deleterious        |
| 123006     | MASTL    | 10,27454325,C,A                                    | P223Q             | probably damaging     | medium                      | Damaging        | Deleterious        |
| 123163     | DYNC1H1  | 14,102507911,C,G                                   | T3981R            | probably damaging     | medium                      | Tolerated       | Deleterious        |
|            | CHAF1A   | 19,4431979,C,T                                     | R660C             | probably damaging     | low                         | Damaging        | Deleterious        |
| 123320     | MSH2     | 2,47630468,C,G                                     | H46Q              | probably damaging     | medium                      | Damaging        | Deleterious        |
| 124744     | FANCL    | 2,58392874,G,A                                     | R226C             | probably damaging     | medium                      | Damaging        | Deleterious        |
| 125659     | EEPD1    | 7,36327344,C,T                                     | R425W             | probably damaging     | low                         | Damaging        | Deleterious        |
| 126780     | ERCC2    | 19,45856060,G,A                                    | R616W             | probably damaging     | high                        | Damaging        | Deleterious        |
| 126875     | ANAPC10  | 4,145916666,A,C                                    | I139M             | probably damaging     | medium                      | Damaging        | Neutral            |
| 127581     | CTC1     | 17,8141897,C,G                                     | S83T              | probably damaging     | medium                      | Damaging        | Neutral            |
| 132231     | C19orf40 | 19,33467427,G,A                                    | V163M             | probably damaging     | medium                      | Damaging        | Neutral            |
| 132406     | DDX11    | 12,31244665,C,T                                    | P387S             | probably damaging     | medium                      | Damaging        | Deleterious        |
|            | LIG1     | 19,48619195,G,A                                    | R871C             | probably damaging     | high                        | Damaging        | Deleterious        |
| 133012     | POLD3    | 11,74345739,A,C                                    | K373T             | probably damaging     | low                         | Damaging        | Deleterious        |
| 130170     | DCLRE1A  | 10,115612595,G,A                                   | P116L             | probably damaging     | medium                      | Tolerated       | Deleterious        |
|            | ERCC4    | 16,14028081,C,T                                    | P379S             | probably damaging     | high                        | Damaging        | Deleterious        |
|            | SPC24    | 19,11257962,T,C                                    | H164R             | probably damaging     | medium                      | Damaging        | Deleterious        |
|            | BMP7     | 20,55758829,G,A                                    | R303C             | probably damaging     | low                         | Damaging        | Deleterious        |
| 130924     | SHPRH    | 6,146243968,G,A                                    | R1184C            | probably damaging     | medium                      | Damaging        | Deleterious        |
|            | NCAPD3   | 11,134090560,A,G                                   | I42T              | probably damaging     | medium                      | Damaging        | Neutral            |
|            | TEX14    | 17,56729334,G,A                                    | P10L              | probably damaging     | neutral                     | Damaging        | Deleterious        |
| 132667     | LIG3     | 17,33318982,C,T                                    | T405I             | probably damaging     | medium                      | Damaging        | Deleterious        |
| 133486     | RFC2     | 7,73654270,C,G                                     | Q231E             | probably damaging     | N/A                         | Damaging        | Deleterious        |
|            | MIS18BP1 | 14,45686268,T,A                                    | H986L             | probably damaging     | medium                      | Damaging        | Deleterious        |

**Supplementary Table 3. Detailed Summary of High Quality Variants in Polyposis Patients**

| Patient ID No.                    | HQ Variant                        | Chr band                                                   | Position                                       | DNA Sequence                                  | AA Sequence                              | Freq                         | Rs No.                                           | SIFT             | PP2                    |
|-----------------------------------|-----------------------------------|------------------------------------------------------------|------------------------------------------------|-----------------------------------------------|------------------------------------------|------------------------------|--------------------------------------------------|------------------|------------------------|
| 120200<br>>20<br>adenos<br>@50    | ERCC3                             | 2q14-21                                                    | 128051205                                      | c.117_118insC                                 | p. S40Lfs*9                              | 0                            | none                                             | NA               | early<br>truncation    |
| 126784<br>10<br>adenos<br>in 20s+ | None                              |                                                            |                                                |                                               |                                          |                              |                                                  |                  |                        |
| 130170<br>>20<br>adenos<br>@47    | DCLRE1A<br>ERCC4<br>SPC24<br>BMP7 | <b>10q25.1-3</b><br>16p13.12-<br>.3<br>19p13.2<br>20q13.31 | 115612595<br>14028081<br>11257962<br>55758829  | c.347C>T<br>c.1135C>T<br>c.491A>G<br>c.907C>T | p.P116L<br>p.P379S<br>p.H164R<br>p.R303C | 0<br>0.004<br>0<br>0         | none<br>rs1799802<br>none<br>none                | D<br>D<br>D<br>D | 0.96<br>1<br>1<br>1    |
| 130924<br>50-100<br>adenos<br>@50 | SHPRH<br>NCAPD3<br>ESPL1<br>TEX14 | 6q24.3<br>11q25<br>12q13.13<br>17q22                       | 146243968<br>134090560<br>53682043<br>56729334 | c.3550C>T<br>c.125T>C<br>c.4464C>G<br>c.29C>T | p.R1184C<br>p.I42T<br>p.I1488M<br>p.P10L | 0.007<br>0.002<br>0.005<br>0 | rs148401398<br>rs112183153<br>rs61737629<br>none | D<br>D<br>D<br>D | 0.99<br>0.95<br>1<br>1 |
| 133486<br>11<br>adenos<br>@33+    | RFC2<br>MIS18BP1                  | 7q11.23<br>14q21.2                                         | 73654270<br>45686268                           | c.691C>G<br>c.2957A>T                         | p.Q231E<br>p.H986L                       | 0<br>0.001                   | none<br>rs139950206                              | D<br>D           | 1<br>0.99              |



**Supplementary Table 4. Demographics of uFCRC Patients**

| Patient ID # | Age at Diagnosis, Sex | CRC Location  | Chemotherapy | Smoking | Smoke Exposure |
|--------------|-----------------------|---------------|--------------|---------|----------------|
| 111797       | 45, unkwn             | unknown       | unknown      | unknown | unknown        |
| 118394       | 49, F                 | sigmoid       | N            | N       | N              |
| 120713 (Pt1) | 48, F                 | left          | N            | Y       | distant        |
| 122517       | <50, F                | left          | N            | N       | N              |
| 123000       | >50, F                | right         | N            | Y       | <1ppd          |
| 123006       | <50, M                | rectum        | Y            | Y       | distant, 2hd   |
| 123163       | <50, F                | rectum        | Y            | unknown | unknown        |
| 123320       | <50, F                | unknown       | Y            | N       | 2hd            |
| 124744       | <50, F                | unknown       | Y            | N       | 2hd            |
| 125380       | <50, M                | rectum        | Y            | Y       | occ cigar      |
| 125659       | <50, M                | rectum        | Y            | N       | 2hd            |
| 129338       | >50, F                | right         | Y            | Y       | 10pk-ys        |
| 132231       | 40, F                 | rectum        | N            | Y       | 20pk-ys        |
| 132406       | >50, M                | transverse    | Y            | Y       | 30pk-ys        |
| 132667       | <50, M                | transverse    | N            | Y       | 30pk-ys        |
| 133012       | <50, M                | sigmoid       | Y            | Y       | 40pk-ys        |
| 134321       | <50, M                | recto-sigmoid | Y            | N       | 2hd            |
| 133486       | >50, F                | unknown       | N            | unknown | unknown        |

Smoke exposure legends: ppd- pack per day; occ- occasional; pk-ys- pack years, 2hd- second hand smoke.

Supplementary table 5

Representation of the variants in the Exome Variant Server (EVS)

Variants from Supplementary Table 1

|          |              | EA Allele # | AA Allele # | All Allele # | EA Genotype #      | AA Genotype #     | All Genotype #     |
|----------|--------------|-------------|-------------|--------------|--------------------|-------------------|--------------------|
| CHAF1B   | 21:37758481  | C=46/T=8554 | C=8/T=4398  | C=54/T=12952 | CC=0/CT=46/TT=4254 | CC=0/CT=8/TT=2195 | CC=0/CT=54/TT=6449 |
| SHPRH    | 6:146243968  | A=51/G=8175 | A=4/G=3794  | A=55/G=11969 | AA=0/AG=51/GG=4062 | AA=0/AG=4/GG=1895 | AA=0/AG=55/GG=5957 |
| WRN      | 8:30969156   | T=5/C=8595  | T=0/C=4406  | T=5/C=13001  | TT=0/TC=5/CC=4295  | TT=0/TC=0/CC=2203 | TT=0/TC=5/CC=6498  |
| ERCC6    | 10:50738771  |             |             |              |                    |                   |                    |
| POLD1    | 19:50909713  |             |             |              |                    |                   |                    |
| MCM10    | 10:13240791  | A=42/C=8558 | A=6/C=4400  | A=48/C=12958 | AA=0/AC=42/CC=4258 | AA=0/AC=6/CC=2197 | AA=0/AC=48/CC=6455 |
| MPG      | 16:135643    |             |             |              |                    |                   |                    |
| SKA1     | 18:47917649  |             |             |              |                    |                   |                    |
| SPAG5    | 17:26918796  |             |             |              |                    |                   |                    |
| BRD4     | 19:15376259  |             |             |              |                    |                   |                    |
| MASTL    | 10:27454325  |             |             |              |                    |                   |                    |
| DYNCH1   | 14:102507911 | G=38/C=8562 | G=4/C=4402  | G=42/C=12964 | GG=0/GC=38/CC=4262 | GG=0/GC=4/CC=2199 | GG=0/GC=42/CC=6461 |
| CHAF1A   | 19:4431979   |             |             |              |                    |                   |                    |
| MSH2     | 2:47630468   | G=2/C=8584  | G=1/C=4379  | G=3/C=12963  | GG=0/GC=2/CC=4291  | GG=0/GC=1/CC=2189 | GG=0/GC=3/CC=6480  |
| FANCL    | 2:58392874   |             |             |              |                    |                   |                    |
| EEP1     | 7:36327344   | T=1/C=8599  | T=1/C=4405  | T=2/C=13004  | TT=0/TC=1/CC=4299  | TT=0/TC=1/CC=2202 | TT=0/TC=2/CC=6501  |
| ERCC2    | 19:45856060  | A=1/G=8599  | A=0/G=4406  | A=1/G=13005  | AA=0/AG=1/GG=4299  | AA=0/AG=0/GG=2203 | AA=0/AG=1/GG=6502  |
| ANAPC10  | 4:145916666  | C=6/A=8196  | C=0/A=3738  | C=6/A=11934  | CC=0/CA=6/AA=4095  | CC=0/CA=0/AA=1869 | CC=0/CA=6/AA=5964  |
| CTC1     | 17:8141897   | G=76/C=8336 | G=4/C=4114  | G=80/C=12450 | GG=1/GC=74/CC=4131 | GG=0/GC=4/CC=2055 | GG=1/GC=78/CC=6186 |
| C19orf40 | 19:33467427  | A=2/G=8598  | A=3/G=4403  | A=5/G=13001  | AA=0/AG=2/GG=4298  | AA=0/AG=3/GG=2200 | AA=0/AG=5/GG=6498  |
| DDX11    | 12:31244665  |             |             |              |                    |                   |                    |
| LIG1     | 19:48619195  |             |             |              |                    |                   |                    |
| LIG3     | 17:33318982  |             |             |              |                    |                   |                    |
| POLD3    | 11:74345739  | C=2/A=8584  | C=2/A=4398  | C=4/A=12982  | CC=0/CA=2/AA=4291  | CC=0/CA=2/AA=2198 | CC=0/CA=4/AA=6489  |

Variants from Supplementary Table 3

|          |              |              |             |               |                     |                    |                     |
|----------|--------------|--------------|-------------|---------------|---------------------|--------------------|---------------------|
| ERCC3    | 2:128051205  |              |             |               |                     |                    |                     |
| DCLRE1A  | 10:115612595 |              |             |               |                     |                    |                     |
| ERCC4    | 16:14028081  | T=50/C=8550  | T=7/C=4387  | T=57/C=12937  | TT=0/TC=50/CC=4250  | TT=0/TC=7/CC=2190  | TT=0/TC=57/CC=6440  |
| SPC24    | 19:11257962  |              |             |               |                     |                    |                     |
| BMP7     | 20:55758829  |              |             |               |                     |                    |                     |
| SHPRH    | 6:146243968  | A=51/G=8175  | A=4/G=3794  | A=55/G=11969  | AA=0/AG=51/GG=4062  | AA=0/AG=4/GG=1895  | AA=0/AG=55/GG=5957  |
| NCAPD3   | 11:134090560 | G=33/A=8561  | G=4/A=4398  | G=37/A=12959  | GG=0/GA=33/AA=4264  | GG=0/GA=4/AA=2197  | GG=0/GA=37/AA=6461  |
| ESPL1    | 12:53682043  | G=105/C=8495 | G=15/C=4391 | G=120/C=12886 | GG=1/GC=103/CC=4196 | GG=0/GC=15/CC=2188 | GG=1/GC=118/CC=6384 |
| TEX14    | 17:56729334  |              |             |               |                     |                    |                     |
| RFC2     | 7:73654270   |              |             |               |                     |                    |                     |
| MIS18BP1 | 14:45686268  | A=12/T=8588  | A=2/T=4404  | A=14/T=12992  | AA=0/AT=12/TT=4288  | AA=0/AT=2/TT=2201  | AA=0/AT=14/TT=6489  |

**Supplementary table 6**

**Representation of the variants in Exome Aggregation Consortium (ExAC)**

Variants from Supplementary Table 1

|          |              | in total population |               |                      |                  | in European non Finnish |               |                      |                  |
|----------|--------------|---------------------|---------------|----------------------|------------------|-------------------------|---------------|----------------------|------------------|
|          |              | allele count        | allele number | number of homozygous | allele frequency | allele count            | allele number | number of homozygous | allele frequency |
| CHAF1B   | 21:37758481  | 335                 | 121332        | 2                    | 0.002761         | 261                     | 66668         | 2                    | 0.003915         |
| SHPRH    | 6:146243968  | 356                 | 118900        | 2                    | 0.002994         | 266                     | 65964         | 0                    | 0.004033         |
| WRN      | 8:30969156   | 66                  | 121302        | 0                    | 0.0005441        | 63                      | 66676         | 0                    | 0.0009449        |
| ERCC6    | 10:50738771  | 1                   | 121396        | 0                    | 0.000008238      | 0                       | 66732         | 0                    | 0                |
| POLD1    | 19:50909713  |                     |               |                      |                  |                         |               |                      |                  |
| MCM10    | 10:13240791  | 482                 | 120748        | 2                    | 0.003992         | 98                      | 66438         | 2                    | 0.005991         |
| MPG      | 16:135643    |                     |               |                      |                  |                         |               |                      |                  |
| SKA1     | 18:47917649  |                     |               |                      |                  |                         |               |                      |                  |
| SPAG5    | 17:26918796  | 2                   | 121300        | 0                    | 0.00001649       | 0                       | 66682         | 0                    | 0                |
| BRD4     | 19:15376259  | 83                  | 89582         | 1                    | 0.0009265        | 63                      | 51154         | 0                    | 0.001232         |
| MASTL    | 10:27454325  |                     |               |                      |                  |                         |               |                      |                  |
| DYNCH1   | 14:102507911 | 414                 | 121362        | 2                    | 0.003411         | 378                     | 66710         | 2                    | 0.005666         |
| CHAF1A   | 19:4431979   | 2                   | 120598        | 0                    | 0.00001658       | 0                       | 66432         | 0                    | 0                |
| MSH2     | 2:47630468   | 23                  | 74776         | 0                    | 0.0003076        | 23                      | 43494         | 0                    | 0.0005288        |
| FANCL    | 2:58392874   | 2                   | 121404        | 0                    | 0.00001647       | 0                       | 66738         | 0                    | 0                |
| EEDP1    | 7:36327344   | 41                  | 121376        | 0                    | 0.0003378        | 36                      | 66710         | 0                    | 0.0005396        |
| ERCC2    | 19:45856060  | 6                   | 120726        | 0                    | 0.0000497        | 4                       | 66302         | 0                    | 6.03E-05         |
| ANAPC10  | 4:145916666  | 88                  | 120700        | 0                    | 0.0007291        | 78                      | 66726         | 0                    | 0.001169         |
| CTC1     | 17:8141897   | 1090                | 119254        | 12                   | 0.00914          | 804                     | 66256         | 6                    | 0.01213          |
| C19orf40 | 19:33467427  | 76                  | 121412        | 0                    | 0.000626         | 39                      | 66740         | 0                    | 0.0005844        |
| DDX11    | 12:31244665  | 18                  | 81074         | 0                    | 0.000222         | 11                      | 45444         | 0                    | 2.421E-05        |
| LIG1     | 19:48619195  |                     |               |                      |                  |                         |               |                      |                  |
| LIG3     | 17:33318982  |                     |               |                      |                  |                         |               |                      |                  |
| POLD3    | 11:74345739  | 49                  | 121286        | 0                    | 0.000404         | 27                      | 66678         | 0                    | 0.0004049        |

Variants from Supplementary Table 3

|         |              |     |        |   |            |     |       |   |           |
|---------|--------------|-----|--------|---|------------|-----|-------|---|-----------|
| ERCC3   | 2:128051205  |     |        |   |            |     |       |   |           |
| DCLRE1A | 10:115612595 | 8   | 121412 | 0 | 0.00006589 | 8   | 66740 | 0 | 0.0001199 |
| ERCC4   | 16:14028081  | 452 | 119924 | 1 | 0.003769   | 347 | 66002 | 1 | 0.005257  |
| SPC24   | 19:11257962  |     |        |   |            |     |       |   |           |
| BMP7    | 20:55758829  | 2   | 121306 | 0 | 0.00001649 | 2   | 66670 | 0 | 3.00E-05  |
| SHPRH   | 6:146243968  | 356 | 118900 | 2 | 0.002994   | 266 | 65964 | 0 | 0.004033  |
| NCAPD3  | 11:134090560 | 364 | 121410 | 0 | 0.002998   | 255 | 66738 | 0 | 0.003821  |

|          |             |     |        |    |            |  |     |       |   |          |
|----------|-------------|-----|--------|----|------------|--|-----|-------|---|----------|
| ESPL1    | 12:53682043 | 719 | 84786  | 10 | 0.00848    |  | 585 | 48156 | 5 | 0.01215  |
| TEX14    | 17:56729334 |     |        |    |            |  |     |       |   |          |
| RFC2     | 7:73654270  | 1   | 54622  | 0  | 0.00001831 |  | 1   | 30422 | 0 | 3.29E-05 |
| MIS18BP1 | 14:45686268 | 114 | 121378 | 1  | 0.0009392  |  | 98  | 66718 | 1 | 0.001469 |

**Supplementary table 7**

**Filteration of HQVs in 1508 normal control population (ITMI cohort) by prediction programs**

| Gene     | INPUT (chromosome; position; Amino acid ref. nt; detected nt) | Mutation<br>Amino acid<br>change | MutationAssessor |                    | PROVEAN<br>prediction | Count of<br>non-neutral<br>impact |
|----------|---------------------------------------------------------------|----------------------------------|------------------|--------------------|-----------------------|-----------------------------------|
|          |                                                               |                                  | prediction       | SIFT<br>prediction |                       |                                   |
| ANAPC10  | 4,145916666,A,C                                               | I139M                            | medium           | Damaging           | -2.32                 | 2                                 |
| BRD4     | 19,15367881,G,A                                               | P482L                            | medium           | Damaging           | -4.13                 | 3                                 |
| BRD4     | 19,15374335,G,A                                               | R413C                            | low              | Damaging           | -5.66                 | 2                                 |
| BRD4     | 19,15376259,G,C                                               | P252R                            | low              | Damaging           | -2.96                 | 2                                 |
| BRD4     | 19,15383849,A,G                                               | L21P                             | low              | Damaging           | -3.55                 | 2                                 |
| C19orf40 | 19,33465062,A,G                                               | M114V                            | medium           | Damaging           | -0.93                 | 2                                 |
| C19orf40 | 19,33467427,G,A                                               | V163M                            | medium           | Damaging           | -1.35                 | 2                                 |
| C19orf40 | 19,33467448,G,C                                               | G170R                            | high             | Damaging           | -7.1                  | 3                                 |
| CCNH     | 5,86703934,G,T                                                | N128K                            | low              | Damaging           | -4.81                 | 2                                 |
| CCNH     | 5,86703939,C,T                                                | G127R                            | low              | Damaging           | -2.64                 | 2                                 |
| CCNH     | 5,86703977,T,G                                                | K114T                            | high             | Damaging           | -5.92                 | 3                                 |
| CDK7     | 5,68550456,T,G                                                | I63R                             | medium           | Damaging           | -6.42                 | 3                                 |
| CDK7     | 5,68550486,A,G                                                | N73S                             | medium           | Damaging           | -4.19                 | 3                                 |
| CDK7     | 5,68553977,T,G                                                | H135Q                            | high             | Damaging           | -7.58                 | 3                                 |
| CDK7     | 5,68558096,G,A                                                | A198T                            | medium           | Damaging           | -3.57                 | 3                                 |
| CDK7     | 5,68565119,C,T                                                | P238L                            | low              | Damaging           | -8.41                 | 2                                 |
| CHAF1B   | 21,37759978,A,G                                               | N70S                             | neutral          | Damaging           | -4.83                 | 2                                 |
| CHAF1B   | 21,37785217,C,T                                               | T366M                            | medium           | Damaging           | -4.23                 | 3                                 |
| CHAF1B   | 21,37785612,C,T                                               | R498W                            | low              | Damaging           | -2.73                 | 2                                 |
| CTC1     | 17,8138536,A,G                                                | L425P                            | medium           | Damaging           | -3.96                 | 3                                 |
| DCLRE1A  | 10,115594988,C,T                                              | V1016I                           | high             | Damaging           | -0.97                 | 2                                 |
| DCLRE1A  | 10,115607074,C,T                                              | A716T                            | medium           | Damaging           | -3.95                 | 3                                 |
| DCLRE1A  | 10,115612553,G,A                                              | S130F                            | medium           | Damaging           | -2.51                 | 3                                 |
| DDB1     | 11,61077336,G,A                                               | T833I                            | medium           | Damaging           | -5.71                 | 3                                 |
| DDX11    | 12,31249877,C,T                                               | A591V                            | medium           | Damaging           | -2.75                 | 3                                 |
| DYNC1H1  | 14,102516823,G,A                                              | V4622M                           | medium           | Damaging           | -1.6                  | 2                                 |
| EEPD1    | 7,36194388,G,A                                                | G152D                            | high             | Damaging           | -5.22                 | 3                                 |
| EEPD1    | 7,36320746,C,T                                                | P318L                            | low              | Damaging           | -4.35                 | 2                                 |
| EEPD1    | 7,36327344,C,T                                                | R425W                            | low              | Damaging           | -2.5                  | 2                                 |
| EEPD1    | 7,36338681,G,A                                                | G526R                            | medium           | Damaging           | -4.92                 | 3                                 |
| EEPD1    | 7,36338721,A,G                                                | Y539C                            | low              | Damaging           | -3.67                 | 2                                 |
| ERCC1    | 19,45917271,C,T                                               | V242M                            | medium           | Damaging           | -2.48                 | 2                                 |
| ERCC1    | 19,45923658,G,A                                               | R117C                            | medium           | Damaging           | -4.94                 | 3                                 |
| ERCC2    | 19,45854939,A,G                                               | L744P                            | medium           | Damaging           | -4.48                 | 3                                 |
| ERCC2    | 19,45855574,G,A                                               | R695C                            | medium           | Damaging           | -4.77                 | 3                                 |
| ERCC2    | 19,45855588,C,T                                               | R690Q                            | low              | Damaging           | -3.04                 | 2                                 |
| ERCC2    | 19,45855889,G,A                                               | R641W                            | medium           | Damaging           | -7.07                 | 3                                 |
| ERCC2    | 19,45855906,G,A                                               | A635V                            | medium           | Damaging           | -3.76                 | 3                                 |
| ERCC2    | 19,45856370,C,T                                               | R601Q                            | high             | Damaging           | -3.81                 | 3                                 |
| ERCC2    | 19,45856397,C,T                                               | R592H                            | medium           | Damaging           | -4.69                 | 3                                 |
| ERCC2    | 19,45864824,G,A                                               | L399F                            | medium           | Damaging           | -2.28                 | 2                                 |
| ERCC2    | 19,45867291,G,A                                               | T301M                            | medium           | Damaging           | -3.57                 | 3                                 |
| ERCC2    | 19,45867721,G,A                                               | R227C                            | medium           | Damaging           | -5.21                 | 3                                 |
| ERCC2    | 19,45867790,C,T                                               | V204M                            | medium           | Damaging           | -2.28                 | 2                                 |

|            |                  |        |        |           |       |   |
|------------|------------------|--------|--------|-----------|-------|---|
| ERCC2      | 19,45868103,C,T  | R196Q  | high   | Damaging  | -3.31 | 3 |
| ERCC2      | 19,45868404,G,A  | R125C  | medium | Damaging  | -5.47 | 3 |
| ERCC2      | 19,45872347,A,G  | L55P   | medium | Damaging  | -6.32 | 3 |
| ERCC2      | 19,45873449,T,C  | Y16C   | medium | Tolerated | -5.11 | 2 |
| ERCC3      | 2,128018872,C,T  | D666N  | medium | Damaging  | -4.84 | 3 |
| ERCC3      | 2,128038147,G,A  | A468V  | high   | Damaging  | -3.83 | 3 |
| ERCC3      | 2,128047345,C,T  | V193M  | medium | Damaging  | -2.25 | 2 |
| ERCC4      | 16,14024712,T,C  | L313P  | medium | Damaging  | -4.78 | 3 |
| ERCC4      | 16,14026028,G,C  | D330H  | high   | Damaging  | -5.94 | 3 |
| ERCC4      | 16,14031663,C,T  | R618C  | medium | Damaging  | -3.99 | 3 |
| ERCC4      | 16,14031664,G,A  | R618H  | medium | Damaging  | -2.32 | 2 |
| ERCC4      | 16,14041570,T,C  | I706T  | low    | Damaging  | -4.1  | 2 |
| ERCC4      | 16,14041701,C,T  | R750C  | high   | Damaging  | -6.35 | 3 |
| ERCC4      | 16,14041848,C,T  | R799W  | medium | Damaging  | -6.12 | 3 |
| BIVM-ERCC5 | 13,103504591,G,A | R71H   | medium | Damaging  | -2.89 | 3 |
| ERCC5      | 13,103514032,C,T | S283F  | medium | Damaging  | -3.93 | 3 |
| ERCC5      | 13,103514049,T,C | Y289H  | medium | Damaging  | -3.2  | 3 |
| ERCC5      | 13,103514060,A,G | I292M  | medium | Damaging  | -1.97 | 2 |
| BIVM-ERCC5 | 13,103520471,C,T | R848W  | medium | Damaging  | -4.42 | 3 |
| BIVM-ERCC5 | 13,103524556,G,C | W896S  | medium | Damaging  | -7.73 | 3 |
| BIVM-ERCC5 | 13,103525619,C,T | R964W  | low    | Damaging  | -2.82 | 2 |
| BIVM-ERCC5 | 13,103527733,G,A | R1014K | medium | Damaging  | -1.43 | 2 |
| BIVM-ERCC5 | 13,103527791,A,T | E1033D | medium | Damaging  | -1.21 | 2 |
| ERCC6      | 10,50666943,C,T  | R1467Q | medium | Damaging  | -2.49 | 2 |
| ERCC6      | 10,50669416,C,A  | G1322V | medium | Damaging  | -4.57 | 3 |
| ERCC6      | 10,50678245,T,C  | K1254R | medium | Damaging  | -2.82 | 3 |
| ERCC6      | 10,50680998,A,G  | V929A  | medium | Damaging  | -3.8  | 3 |
| ERCC6      | 10,50690906,G,A  | R666C  | medium | Damaging  | -5.42 | 3 |
| ERCC6      | 10,50732202,T,G  | D425A  | medium | Damaging  | -3.65 | 3 |
| ERCC6      | 10,50740716,C,T  | V99I   | medium | Damaging  | -0.51 | 2 |
| ERCC8      | 5,60194136,C,A   | R270S  | medium | Damaging  | -4.98 | 3 |
| ERCC8      | 5,60199475,C,T   | G184S  | medium | Tolerated | -4.13 | 2 |
| ERCC8      | 5,60224715,T,C   | D50G   | low    | Damaging  | -4    | 2 |
| ESPL1      | 12,53676058,G,A  | G877D  | medium | Damaging  | -3.77 | 3 |
| ESPL1      | 12,53680689,G,A  | R1390H | medium | Damaging  | -2.04 | 2 |
| FANCL      | 2,58390062,A,G   | L281S  | medium | Damaging  | -2.14 | 2 |
| FANCL      | 2,58392928,C,T   | D208N  | medium | Damaging  | -4.45 | 3 |
| FANCL      | 2,58459236,G,C   | F36L   | medium | Damaging  | -3.69 | 3 |
| GTF2H1     | 11,18387397,G,A  | R543H  | low    | Damaging  | -2.5  | 2 |
| GTF2H3     | 12,124144129,C,G | L228V  | medium | Damaging  | -1.97 | 2 |
| GTF2H3     | 12,124144450,G,T | G265C  | medium | Damaging  | -7.95 | 3 |
| GTF2H3     | 12,124144623,C,T | T284M  | medium | Damaging  | -5.4  | 3 |
| LIG1       | 19,48620943,C,A  | K845N  | medium | Damaging  | -4.41 | 3 |
| LIG1       | 19,48620981,C,G  | D833H  | high   | Damaging  | -6.63 | 3 |
| LIG1       | 19,48624522,C,T  | A764T  | medium | Damaging  | -2.53 | 3 |
| LIG1       | 19,48626566,G,A  | R672C  | medium | Damaging  | -5.92 | 3 |
| LIG1       | 19,48631177,C,A  | R641L  | high   | Damaging  | -6.99 | 3 |
| LIG1       | 19,48639372,C,T  | G448R  | medium | Damaging  | -7.99 | 3 |
| LIG1       | 19,48643312,G,A  | L335F  | medium | Damaging  | -3.66 | 3 |
| LIG1       | 19,48646806,G,A  | S303F  | medium | Damaging  | -5.36 | 3 |

|          |                 |       |         |           |        |   |
|----------|-----------------|-------|---------|-----------|--------|---|
| LIG3     | 17,33310476,G,A | R151Q | medium  | Damaging  | -3.79  | 3 |
| LIG3     | 17,33318086,C,T | R332C | medium  | Damaging  | -5.79  | 3 |
| LIG3     | 17,33326328,G,A | G706S | medium  | Damaging  | -5.79  | 3 |
| LIG3     | 17,33326434,T,C | L741P | medium  | Damaging  | -6.12  | 3 |
| MASTL    | 10,27450076,C,T | T173M | low     | Damaging  | -5.67  | 2 |
| MASTL    | 10,27456090,C,T | L291F | medium  | Damaging  | -1.77  | 2 |
| MASTL    | 10,27456142,C,A | T308N | medium  | Damaging  | -1.42  | 2 |
| MASTL    | 10,27459243,C,A | S452Y | medium  | Damaging  | -2.3   | 2 |
| MASTL    | 10,27459497,G,A | D537N | medium  | Damaging  | -1.68  | 2 |
| MASTL    | 10,27459845,G,C | V653L | medium  | Damaging  | -1.32  | 2 |
| MASTL    | 10,27459855,G,C | R656P | medium  | Damaging  | -2.28  | 2 |
| MCM10    | 10,13228184,T,A | H374Q | medium  | Tolerated | -2.93  | 2 |
| MCM10    | 10,13228213,C,G | A384G | medium  | Damaging  | -2.3   | 2 |
| MCM10    | 10,13230942,G,A | R427H | medium  | Damaging  | -3.85  | 3 |
| MCM10    | 10,13231019,C,T | R453W | low     | Damaging  | -3.88  | 2 |
| MCM10    | 10,13231065,C,G | S468W | neutral | Damaging  | -2.81  | 2 |
| MCM10    | 10,13246349,C,T | P829L | medium  | Damaging  | -9.11  | 3 |
| MCM10    | 10,13246360,T,C | C833R | medium  | Damaging  | -11    | 3 |
| MCM10    | 10,13251099,G,A | G837D | medium  | Damaging  | -4.18  | 3 |
| MCM10    | 10,13251117,G,A | R843Q | medium  | Damaging  | -3.3   | 3 |
| MCM10    | 10,13251278,G,A | E866K | medium  | Damaging  | -3.63  | 3 |
| MIS18BP1 | 14,45686268,T,A | H986L | medium  | Damaging  | -6.22  | 3 |
| MIS18BP1 | 14,45687647,A,G | S894P | medium  | Damaging  | -3.02  | 3 |
| MIS18BP1 | 14,45693152,A,G | W880R | medium  | Damaging  | -10.18 | 3 |
| MIS18BP1 | 14,45693698,T,G | T698P | low     | Damaging  | -2.96  | 2 |
| MMS19    | 10,99218991,G,A | P985S | medium  | Damaging  | -4.04  | 3 |
| MMS19    | 10,99219865,C,T | R865H | medium  | Damaging  | -2.94  | 3 |
| MMS19    | 10,99219890,G,A | H857Y | medium  | Damaging  | -4.3   | 3 |
| MMS19    | 10,99219980,G,A | L827F | medium  | Damaging  | -2.58  | 3 |
| MMS19    | 10,99226333,G,T | S478Y | low     | Damaging  | -2.93  | 2 |
| MMS19    | 10,99228103,A,C | L375W | medium  | Damaging  | -5.45  | 3 |
| MMS19    | 10,99229410,C,T | R306H | medium  | Damaging  | -3.68  | 3 |
| MNAT1    | 14,61201615,C,T | T12I  | low     | Damaging  | -5.26  | 2 |
| MPG      | 16,133061,G,A   | R109Q | high    | Damaging  | -3.43  | 3 |
| MPG      | 16,133099,G,A   | V122M | high    | Damaging  | -2.78  | 3 |
| MPG      | 16,133143,C,A   | H136Q | high    | Tolerated | -6.54  | 2 |
| MPG      | 16,133199,C,A   | T155N | medium  | Damaging  | -4.59  | 3 |
| MPG      | 16,133222,G,A   | G163S | high    | Damaging  | -5.83  | 3 |
| MPG      | 16,135498,C,T   | R207C | medium  | Damaging  | -4.39  | 3 |
| MPG      | 16,135717,C,T   | R280W | medium  | Damaging  | -3.66  | 3 |
| MPG      | 16,135720,G,A   | G281S | medium  | Damaging  | -4.28  | 3 |
| MSH2     | 2,47630468,C,G  | H46Q  | medium  | Damaging  | -6.71  | 3 |
| MSH2     | 2,47630523,A,G  | K65E  | medium  | Damaging  | -3.18  | 3 |
| MSH2     | 2,47635588,C,A  | S87Y  | medium  | Damaging  | -3.7   | 3 |
| MSH2     | 2,47641430,C,T  | A272V | medium  | Damaging  | -3.5   | 3 |
| MSH2     | 2,47641520,T,C  | L302S | medium  | Damaging  | -5.57  | 3 |
| MSH2     | 2,47643513,C,G  | L341V | high    | Damaging  | -2.93  | 3 |
| MSH2     | 2,47693886,C,T  | R534C | medium  | Damaging  | -7.68  | 3 |
| MSH2     | 2,47693887,G,A  | R534H | medium  | Damaging  | -4.72  | 3 |
| MSH2     | 2,47702202,G,T  | A600S | medium  | Damaging  | -2.72  | 3 |

|        |                  |        |         |          |       |   |
|--------|------------------|--------|---------|----------|-------|---|
| MSH2   | 2,47710015,T,G   | L911R  | low     | Damaging | -4.26 | 2 |
| NCAPD3 | 11,134046212,C,A | D1031Y | low     | Damaging | -4.43 | 2 |
| NCAPD3 | 11,134047319,T,C | K939R  | medium  | Damaging | -2.69 | 3 |
| NCAPD3 | 11,134062723,G,C | Q636E  | medium  | Damaging | -1.91 | 2 |
| NCAPD3 | 11,134062766,C,G | L621F  | medium  | Damaging | -3.07 | 3 |
| POLD1  | 19,50905504,G,A  | R211H  | low     | Damaging | -3.35 | 2 |
| POLD1  | 19,50905989,G,A  | G321S  | low     | Damaging | -5.36 | 2 |
| POLD1  | 19,50905992,C,T  | R322C  | medium  | Damaging | -7.57 | 3 |
| POLD1  | 19,50909683,A,G  | K468R  | medium  | Damaging | -2.91 | 3 |
| POLD1  | 19,50910297,C,A  | L518M  | high    | Damaging | -1.97 | 2 |
| POLD1  | 19,50910352,C,T  | A536V  | high    | Damaging | -3.88 | 3 |
| POLD1  | 19,50912813,C,T  | R682W  | medium  | Damaging | -5.8  | 3 |
| POLD1  | 19,50917074,C,T  | R776W  | high    | Damaging | -6.69 | 3 |
| POLD1  | 19,50919693,C,G  | T954R  | medium  | Damaging | -3.75 | 3 |
| POLD1  | 19,50919693,C,T  | T954M  | medium  | Damaging | -3.31 | 3 |
| POLD1  | 19,50920465,C,T  | R1053C | high    | Damaging | -6.77 | 3 |
| POLD3  | 11,74340350,G,A  | D330N  | medium  | Damaging | -2.72 | 3 |
| POLD3  | 11,74345670,C,T  | S350F  | medium  | Damaging | -1.98 | 2 |
| POLD3  | 11,74345739,A,C  | K373T  | low     | Damaging | -2.76 | 2 |
| RAD23B | 9,110086255,C,T  | A301V  | medium  | Damaging | -3.05 | 3 |
| RPA1   | 17,1747233,C,T   | T35M   | medium  | Damaging | -2    | 2 |
| RPA1   | 17,1782352,C,G   | N252K  | low     | Damaging | -3.57 | 2 |
| RPA1   | 17,1782542,G,T   | A265S  | medium  | Damaging | -2.97 | 3 |
| RPA1   | 17,1782605,G,T   | V286F  | medium  | Damaging | -3.83 | 3 |
| RPA1   | 17,1783909,C,T   | R389W  | medium  | Damaging | -5.53 | 3 |
| RPA1   | 17,1792054,A,G   | N487S  | medium  | Damaging | -4.03 | 3 |
| RPA3   | 7,7676650,C,A    | G116V  | low     | Damaging | -3.35 | 2 |
| RPA3   | 7,7677536,C,T    | C81Y   | low     | Damaging | -5.95 | 2 |
| SKA1   | 18,47902248,G,T  | K16N   | medium  | Damaging | -2.56 | 3 |
| SPAG5  | 17,26910923,G,A  | R832W  | low     | Damaging | -4.89 | 2 |
| TEX14  | 17,56676322,T,C  | Y801C  | medium  | Damaging | -4.85 | 3 |
| TEX14  | 17,56676493,T,C  | Q744R  | medium  | Damaging | -2.63 | 3 |
| TEX14  | 17,56676845,C,T  | E627K  | medium  | Damaging | -2.29 | 2 |
| TEX14  | 17,56682353,T,C  | Q447R  | medium  | Damaging | -3.07 | 3 |
| TEX14  | 17,56688585,T,C  | Y380C  | low     | Damaging | -7.06 | 2 |
| TEX14  | 17,56688600,C,T  | R375H  | high    | Damaging | -2.87 | 3 |
| TEX14  | 17,56688648,T,C  | Q359R  | high    | Damaging | -3.4  | 3 |
| TEX14  | 17,56688700,G,A  | R342W  | medium  | Damaging | -5.53 | 3 |
| TEX14  | 17,56690823,G,A  | R328C  | low     | Damaging | -5.27 | 2 |
| TEX14  | 17,56692633,G,A  | R287W  | medium  | Damaging | -4.9  | 3 |
| TEX14  | 17,56700278,C,T  | R116Q  | neutral | Damaging | -3.43 | 2 |
| TEX14  | 17,56700329,G,A  | S99L   | low     | Damaging | -4.88 | 2 |
| WRN    | 8,30916020,G,A   | M19I   | medium  | Damaging | -2.19 | 2 |
| WRN    | 8,30916717,T,A   | F49I   | medium  | Damaging | -3.42 | 3 |
| WRN    | 8,30922518,T,A   | L148Q  | low     | Damaging | -2.88 | 2 |
| WRN    | 8,30924631,G,A   | R196H  | high    | Damaging | -3.08 | 3 |
| WRN    | 8,30924661,C,T   | T206I  | medium  | Damaging | -3.09 | 3 |
| WRN    | 8,30948045,A,G   | T573A  | high    | Damaging | -4.71 | 3 |
| WRN    | 8,30949351,C,G   | S612C  | low     | Damaging | -3.38 | 2 |
| WRN    | 8,30954294,C,T   | R637W  | medium  | Damaging | -6.76 | 3 |



|      |                |        |        |           |       |   |
|------|----------------|--------|--------|-----------|-------|---|
| WRN  | 8,30969150,C,T | T703I  | high   | Damaging  | -5.63 | 3 |
| WRN  | 8,30998956,G,A | R993H  | medium | Damaging  | -3.98 | 3 |
| WRN  | 8,31004622,C,T | S1146L | medium | Tolerated | -3.23 | 2 |
| WRN  | 8,31012237,C,G | T1262R | medium | Damaging  | -3.79 | 3 |
| XAB2 | 19,7685473,C,T | R685Q  | high   | Damaging  | -3.91 | 3 |
| XAB2 | 19,7685492,C,T | G679R  | medium | Damaging  | -7.84 | 3 |
| XAB2 | 19,7685860,C,T | V615M  | medium | Damaging  | -2.63 | 3 |
| XAB2 | 19,7687309,G,A | R509C  | medium | Damaging  | -6.94 | 3 |
| XAB2 | 19,7687766,A,G | L418P  | low    | Damaging  | -4.17 | 2 |
| XAB2 | 19,7687768,G,C | I417M  | medium | Damaging  | -2.36 | 2 |
| XAB2 | 19,7687776,G,A | R415C  | medium | Damaging  | -7.8  | 3 |
| XAB2 | 19,7688667,C,T | V357M  | medium | Damaging  | -2.9  | 3 |
| XAB2 | 19,7690786,G,A | R268C  | medium | Damaging  | -7.25 | 3 |
| XAB2 | 19,7690839,C,T | R250H  | medium | Damaging  | -3.98 | 3 |
| XAB2 | 19,7690855,G,A | R245C  | medium | Damaging  | -7.67 | 3 |
| XPC  | 3,14190078,C,T | G802S  | medium | Damaging  | -4.52 | 3 |
| XPC  | 3,14190117,C,T | D789N  | medium | Damaging  | -4.63 | 3 |
| XPC  | 3,14190421,G,A | R715W  | medium | Damaging  | -4.24 | 3 |
| XPC  | 3,14197947,A,G | Y641H  | medium | Damaging  | -4.13 | 3 |
| XPC  | 3,14206351,C,G | A288P  | low    | Damaging  | -2.98 | 2 |

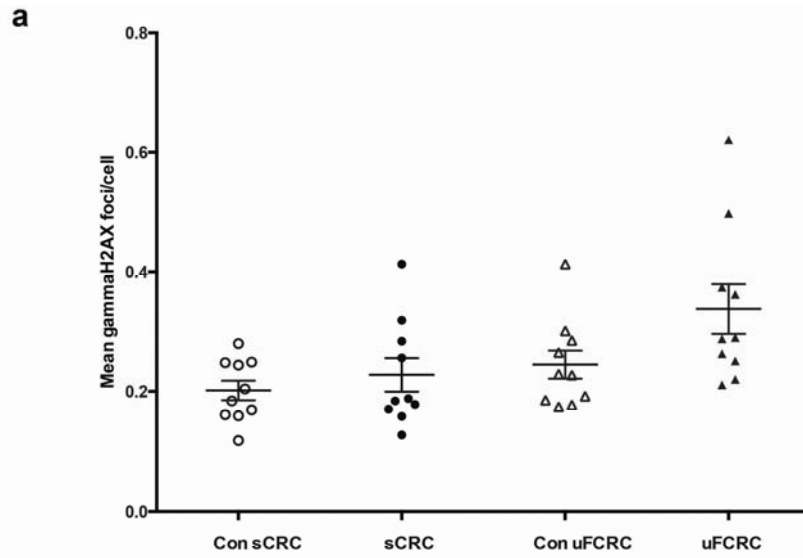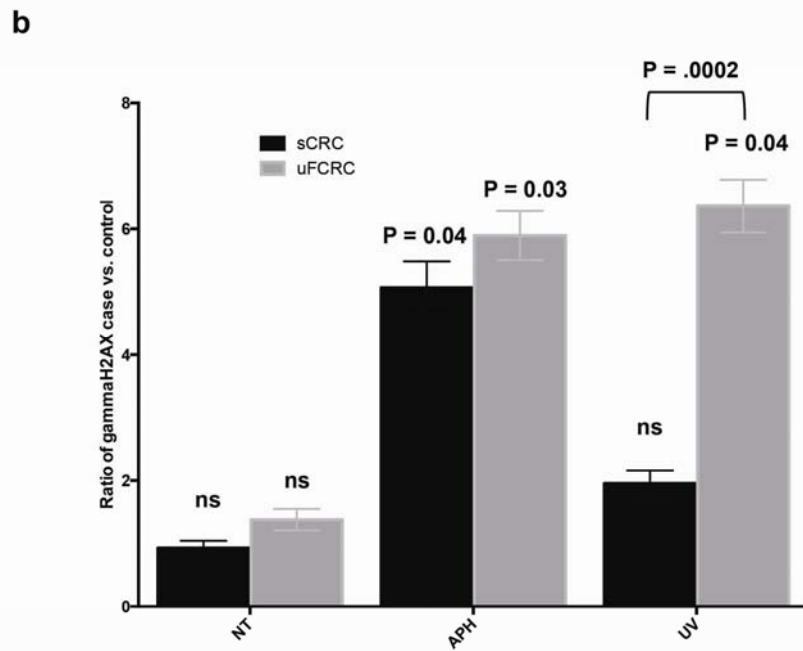

Arora et al, Supp Figure S2

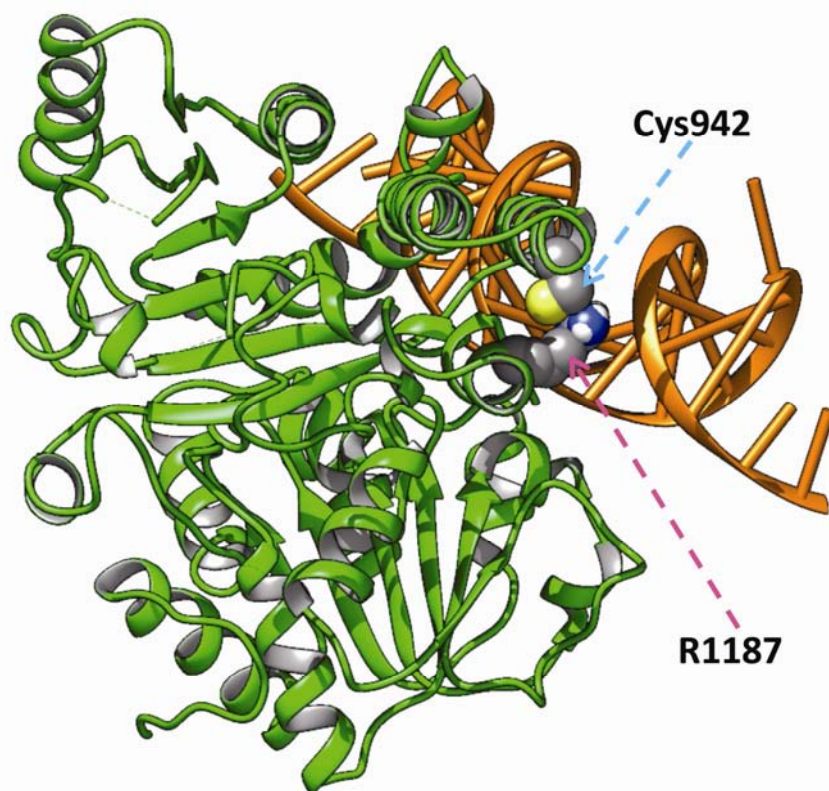

Arora et al, Supp Figure S3

**a**

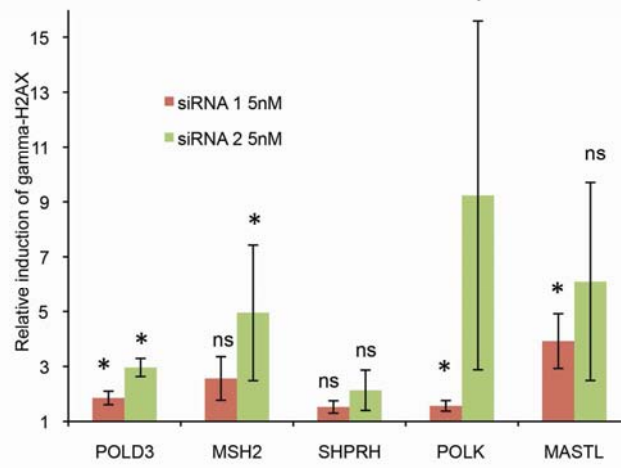

**b**

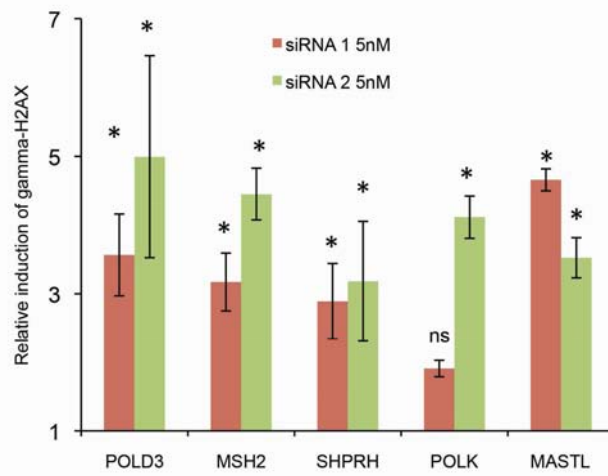

**c**

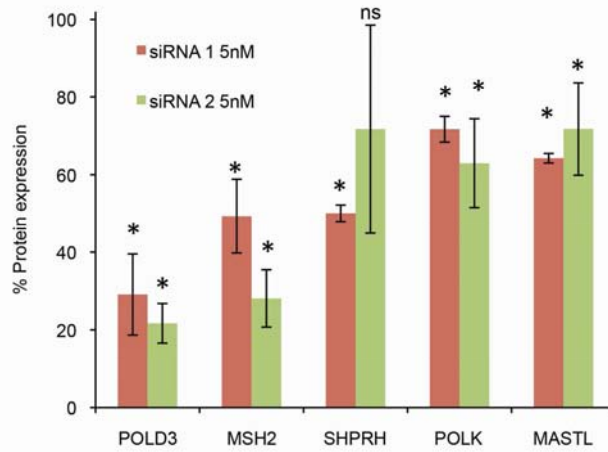

**a**

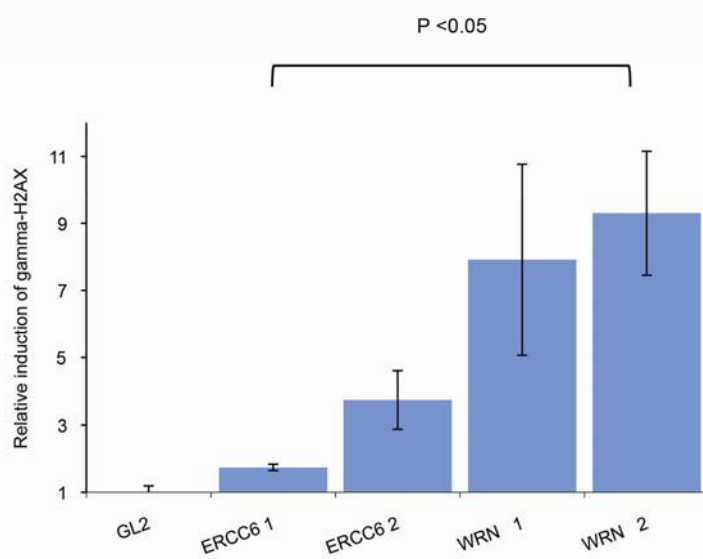



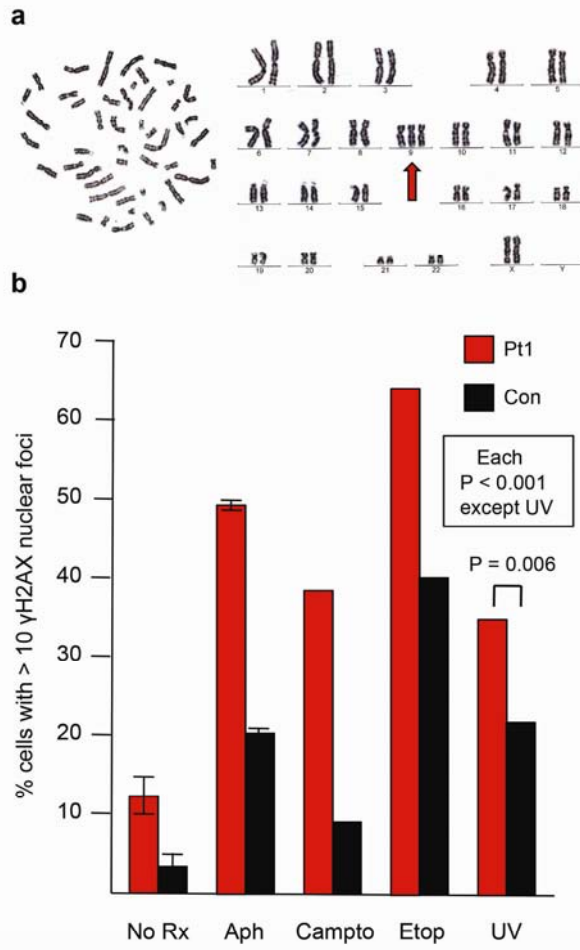

Arora et al, Supp Figure S7

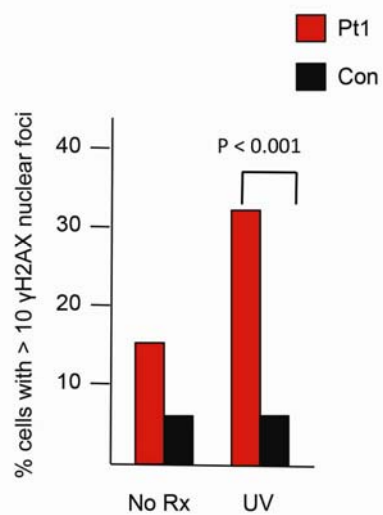



Arora et al, Supp Figure S8

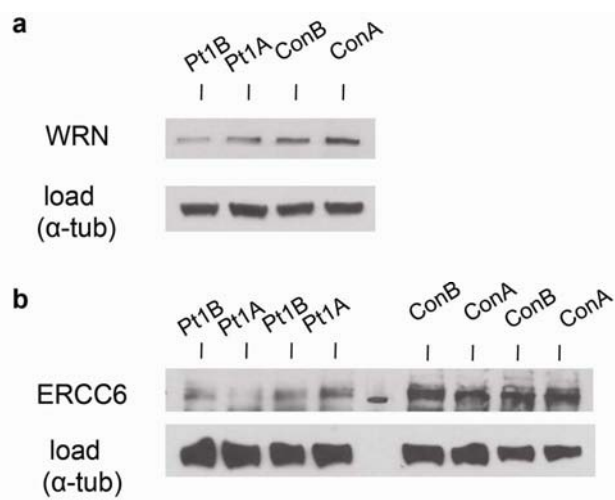

Arora et al, Supp Figure S9

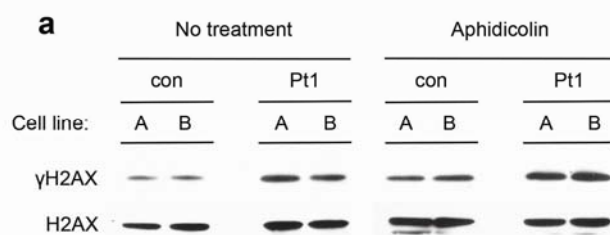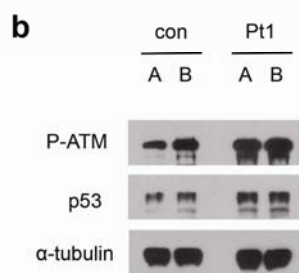

Supplement: NIHMS721291-supplement-01.pdf [file NIHMS721291-supplement-01.pdf]
